# Supplementary material
Source: bioRxiv or medRxiv preprint supplement (https://medrxiv.org/highwire/filestream/82530/field_highwire_adjunct_files/0/2020.05.21.20109041-1.pdf)
Supplement: Supplementary file [file 2020.05.21.20109041-1.pdf]

Technical appendix for Akhmetzhanov et al. "Rising evidence of COVID-19 transmission potential to and between animals: do we need to be concerned?"

```
1 functions {
2   vector algebraic_equation(vector y, vector theta, real[] x_r,
3     int[] x_i) {
4     vector[1] z;
5     z[1] = expm1(-y[1]*theta[1]) + theta[1];
6     return z;
7   }
8 }
9 data {
10  int<lower = 1> N; //total number of samples
11  int<lower = 0, upper = N> n; //number of positive samples
12 }
13
14 transformed data {
15  real X_r[0];
16  int X_i[0];
17
18  vector[1] R0_guess;
19  R0_guess[1] = 1.2;
20 }
21
22 parameters {
23  real<lower = 0, upper = 1> z; //fraction of positively infected
24 }
25
26 transformed parameters {
27  vector[1] theta;
28  theta[1] = z;
29  real<lower = 0> R0;
30
31  R0 = algebra_solver(algebraic_equation, R0_guess, theta, X_r, X
32  _i)[1];
33 }
34 model {
35  z ~ normal(0.5, 1.0);
36  n ~ binomial(N, z);
37 }
38
39 generated quantities {
40  real<lower = 0, upper = 1> p = 1.0 - 1.0/R0; //probability of
41  major outbreak
42 }
```

Listing 1: Stan program used for statistical inference of  $R_0$
